# Supplementary material for: Phosphorus–nitrogen compounds: part 63. Mono- and bis-vanillinatobisferrocenyldispiro(N/N)cyclotriphosphazenes and their macrocyclic Schiff-bases: synthesis, structural characterization and isomerism
Source: Royal Society of Chemistry journal article supplement (doi:10.1039/d2nj00846g), 2022-01-01
Supplement: d2nj00846g1.pdf [file d2nj00846g1.pdf]

**Phosphorus-nitrogen compounds: Part 63. Mono and Bis-vanillinatobisferrocenyldi-spiro(N/N)cyclotriphosphazenes and Their Macrocyclic Schiff-Bases: Synthesis, Structural Characterization and Isomerism**

**Yasemin Tümer, Nuran Asmafiliz, Zeynel Kılıç, Tuncer Hökelek**

**Supplementary Materials**

**Table S1** <sup>13</sup>C (decoupled) NMR spectral data of the dispirophosphazenes. [Chemical shifts (δ) reported in ppm and *J* values in Hz].

|                                                                                   | <b>6</b>                                                                                   | <b>7</b>                                                                                     | <b>9</b>                                                                                 | <b>10</b>                                             | <b>11</b>                                                                                | <b>12</b>                                  | <b>13</b>                                           | <b>14</b>                                  |
|-----------------------------------------------------------------------------------|--------------------------------------------------------------------------------------------|----------------------------------------------------------------------------------------------|------------------------------------------------------------------------------------------|-------------------------------------------------------|------------------------------------------------------------------------------------------|--------------------------------------------|-----------------------------------------------------|--------------------------------------------|
| 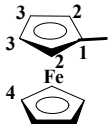 |                                                                                            |                                                                                              |                                                                                          |                                                       |                                                                                          |                                            |                                                     |                                            |
|  |                                                                                            |                                                                                              |                                                                                          |                                                       |                                                                                          |                                            |                                                     |                                            |
| <b>NCH<sub>3</sub></b>                                                            | -                                                                                          | -                                                                                            | -                                                                                        | -                                                     | 31.60<br>31.65                                                                           | -                                          | 31.41<br>31.94                                      | -                                          |
| <b>NCH<sub>2</sub>CH<sub>3</sub></b>                                              | 39.23                                                                                      | 39.27<br><sup>2</sup> J <sub>PC</sub> = 4.1<br>39.38<br><sup>2</sup> J <sub>PC</sub> = 4.4   | 38.90                                                                                    | 39.01                                                 | -                                                                                        | 39.20                                      | -                                                   | 38.88                                      |
| <b>NCH<sub>2</sub>CH<sub>3</sub></b>                                              | 14.11<br><sup>3</sup> J <sub>PC</sub> =2.9<br>14.13<br><sup>3</sup> J <sub>PC</sub> =3.0   | 14.08<br><sup>3</sup> J <sub>PC</sub> =5.3<br>14.15<br><sup>3</sup> J <sub>PC</sub> =5.2     | 13.88<br><sup>3</sup> J <sub>PC</sub> =3.1<br>13.91<br><sup>3</sup> J <sub>PC</sub> =3.1 | 13.89<br><sup>3</sup> J <sub>PC</sub> =2.8            | -                                                                                        | 14.16                                      | -                                                   | 13.90                                      |
| <b>CH<sub>3</sub>NCH<sub>2</sub></b>                                              | -                                                                                          | -                                                                                            | -                                                                                        | -                                                     | 43.85<br><sup>2</sup> J <sub>PC</sub> =12.2<br>43.84                                     | -                                          | 42.09                                               | -                                          |
| <b>C<sub>2</sub>H<sub>5</sub>NCH<sub>2</sub></b>                                  | 43.09<br><sup>2</sup> J <sub>PC</sub> =12.8<br>43.54<br><sup>2</sup> J <sub>PC</sub> =13.0 | 43.60<br><sup>2</sup> J <sub>PC</sub> =9.7<br>43.62<br><sup>2</sup> J <sub>PC</sub> =12.4    | 43.44<br><sup>2</sup> J <sub>PC</sub> =12.9<br>43.45                                     | 43.63<br><sup>2</sup> J <sub>PC</sub> =13.1<br>43.64  | -                                                                                        | 43.50                                      | -                                                   | 43.42                                      |
| <b>NCH<sub>2</sub>CH<sub>2</sub></b>                                              | -                                                                                          | -                                                                                            | -                                                                                        | -                                                     | 28.60<br>28.91                                                                           | 28.77<br>29.43                             | 29.38<br>29.48                                      | 29.68<br>30.32                             |
| <b>NCH<sub>2</sub></b>                                                            | 43.55<br>44.10                                                                             | 44.09<br><sup>2</sup> J <sub>PC</sub> = 12.6<br>44.11<br><sup>2</sup> J <sub>PC</sub> = 12.6 | 44.58<br><sup>2</sup> J <sub>PC</sub> = 12.9<br>44.59                                    | 43.81<br><sup>2</sup> J <sub>PC</sub> = 13.2<br>43.82 | 44.23<br>(spiro)<br>61.43<br>61.50<br>(Schiff-base)                                      | 43.97<br>(spiro)<br>61.47<br>(Schiff-base) | 44.16<br>(spiro)<br>61.27<br>61.50<br>(Schiff-base) | 44.10<br>(spiro)<br>62.53<br>(Schiff-base) |
| <b>FcCH<sub>2</sub></b>                                                           | 44.24                                                                                      | 44.04                                                                                        | 44.19                                                                                    | 44.18                                                 | 47.25<br><sup>2</sup> J <sub>PC</sub> =6.0<br>47.29<br><sup>2</sup> J <sub>PC</sub> =6.0 | 44.20                                      | 47.23                                               | 44.49                                      |
| <b>C4</b>                                                                         | 68.38                                                                                      | 68.41<br>68.44                                                                               | 68.55                                                                                    | 68.58                                                 | 68.36                                                                                    | 68.37                                      | 68.52                                               | 68.52                                      |

|                        |                                            |                                            |                                                                                    |                                            |                                                                                    |                                    |                  |        |
|------------------------|--------------------------------------------|--------------------------------------------|------------------------------------------------------------------------------------|--------------------------------------------|------------------------------------------------------------------------------------|------------------------------------|------------------|--------|
| <b>C3</b>              | 68.05                                      | 68.01                                      | 67.72                                                                              | 67.78                                      | 67.91                                                                              | 67.99                              | 67.71            | 67.44  |
|                        | 68.07                                      | 68.09<br>68.17                             | 67.97                                                                              | 68.37                                      | 67.96<br>67.99<br>68.03                                                            |                                    | 67.92            | 67.90  |
| <b>C2</b>              | 69.31                                      | 69.22                                      | 68.62                                                                              | 69.46                                      | 69.41                                                                              | 69.47                              | 69.91            | 68.77  |
|                        | 69.41                                      | 69.50<br>69.71<br>70.01                    |                                                                                    | 69.54                                      | 69.66<br>69.75                                                                     | 69.71                              | 69.98            |        |
| <b>C1</b>              | 83.96                                      | 83.52                                      | 84.76                                                                              | 83.99                                      | 84.09                                                                              | 84.05                              | 84.74            | 84.84  |
|                        | <sup>3</sup> J <sub>PC</sub> =4.9<br>84.00 | <sup>3</sup> J <sub>PC</sub> =8.7<br>83.80 | <sup>3</sup> J <sub>PC</sub> =4.5<br>84.80                                         | <sup>3</sup> J <sub>PC</sub> =3.9<br>84.02 | <sup>3</sup> J <sub>PC</sub> =4.5<br>84.10                                         |                                    |                  |        |
|                        | <sup>3</sup> J <sub>PC</sub> =5.0          | <sup>3</sup> J <sub>PC</sub> =8.2          | <sup>3</sup> J <sub>PC</sub> =4.5                                                  | <sup>3</sup> J <sub>PC</sub> =3.9          | <sup>3</sup> J <sub>PC</sub> =4.5                                                  |                                    |                  |        |
| <b>OCH<sub>3</sub></b> | 56.19                                      | 56.19                                      | 55.94                                                                              | 56.08                                      | 56.17                                                                              | 56.33                              | 55.93            | 55.96  |
|                        |                                            |                                            | 56.22                                                                              |                                            | 56.28                                                                              |                                    | 56.33            | 56.31  |
| <b>CHO</b>             | 191.05                                     | 191.10                                     | 191.08<br>191.17                                                                   | 191.19                                     | -                                                                                  | -                                  | -                | -      |
| <b>CHN</b>             | -                                          | -                                          | -                                                                                  | -                                          | 160.30<br>160.34                                                                   | 160.30                             | 160.32<br>160.49 | 160.38 |
| <b>C6'</b>             | 121.92                                     | 122.67                                     | 121.70                                                                             | 122.65                                     | 121.76                                                                             | 121.81                             | 121.89           | 121.91 |
|                        | <sup>3</sup> J <sub>PC</sub> =2.5          | <sup>3</sup> J <sub>PC</sub> =3.0          | <sup>3</sup> J <sub>PC</sub> =2.6<br>122.14<br><sup>3</sup> J <sub>PC</sub> =2.6   | <sup>3</sup> J <sub>PC</sub> =3.4          | <sup>3</sup> J <sub>PC</sub> =6.0<br>121.88<br><sup>3</sup> J <sub>PC</sub> =6.0   |                                    | 121.96           |        |
| <b>C5'</b>             | 124.80                                     | 124.68                                     | 124.87                                                                             | 124.72                                     | 124.83                                                                             | 124.86                             | 125.53           | 125.51 |
| <b>C4'</b>             | 133.20                                     | 133.97                                     | 133.08                                                                             | 134.01                                     | 133.04                                                                             | 133.01                             | 132.94           | 133.18 |
|                        |                                            |                                            | 133.29                                                                             |                                            | 133.10                                                                             |                                    | 133.05           |        |
| <b>C3'</b>             | 110.86                                     | 111.07                                     | 110.49<br>110.87                                                                   | 110.89                                     | 110.58                                                                             | 110.61                             | 110.12<br>110.61 | 110.32 |
| <b>C2'</b>             | 146.27                                     | 145.36                                     | 146.10                                                                             | 145.36                                     | 143.14                                                                             | 143.31                             | 142.94           | 143.86 |
|                        | <sup>3</sup> J <sub>PC</sub> =7.5          | <sup>3</sup> J <sub>PC</sub> =8.7          | <sup>3</sup> J <sub>PC</sub> =7.5<br>146.30<br><sup>3</sup> J <sub>PC</sub> =7.4   | <sup>3</sup> J <sub>PC</sub> =9.2          | <sup>3</sup> J <sub>PC</sub> =7.6<br>143.20<br><sup>3</sup> J <sub>PC</sub> =12.1  | <sup>3</sup> J <sub>PC</sub> =10.4 | 142.96           |        |
| <b>C1'</b>             | 151.82                                     | 152.01                                     | 151.64                                                                             | 152.15                                     | 151.56                                                                             | 151.65                             | 151.42           | 151.55 |
|                        | <sup>2</sup> J <sub>PC</sub> = 6.9         | <sup>2</sup> J <sub>PC</sub> =6.3          | <sup>2</sup> J <sub>PC</sub> = 7.3<br>151.90<br><sup>2</sup> J <sub>PC</sub> = 6.6 | <sup>2</sup> J <sub>PC</sub> =6.2          | <sup>2</sup> J <sub>PC</sub> = 6.0<br>151.67<br><sup>2</sup> J <sub>PC</sub> = 6.0 |                                    | 151.64           |        |

**Table S2**  $^1\text{H}$  NMR spectral data of the dispirophosphazenes. [Chemical shifts ( $\delta$ ) reported in ppm and  $J$  values in Hz]. [d: doublet, t: triplet, m: multiplet, bp: broad peak and dd: doublet of doublets].

|                                                                                   | 6                                                                                                                                          | 7                                                                                                                                          | 9                                                                                                                                                                                                                                                                                        | 10                                                                                                                                         | 11                                                                                                                                       | 12                                                                   | 13                                                                       | 14                                                             |
|-----------------------------------------------------------------------------------|--------------------------------------------------------------------------------------------------------------------------------------------|--------------------------------------------------------------------------------------------------------------------------------------------|------------------------------------------------------------------------------------------------------------------------------------------------------------------------------------------------------------------------------------------------------------------------------------------|--------------------------------------------------------------------------------------------------------------------------------------------|------------------------------------------------------------------------------------------------------------------------------------------|----------------------------------------------------------------------|--------------------------------------------------------------------------|----------------------------------------------------------------|
| 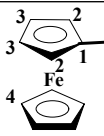 |                                                                                                                                            |                                                                                                                                            |                                                                                                                                                                                                                                                                                          |                                                                                                                                            |                                                                                                                                          |                                                                      |                                                                          |                                                                |
|  |                                                                                                                                            |                                                                                                                                            |                                                                                                                                                                                                                                                                                          |                                                                                                                                            |                                                                                                                                          |                                                                      |                                                                          |                                                                |
| <b><u>NCH<sub>3</sub></u></b>                                                     | -                                                                                                                                          | -                                                                                                                                          | -                                                                                                                                                                                                                                                                                        | -                                                                                                                                          | 2.45<br>(d, 3H)<br>$^3J_{\text{PH}}=4.8$<br>2.51<br>(d, 3H)<br>$^3J_{\text{PH}}=6.0$                                                     | -                                                                    | 2.38<br>(3H)                                                             | -                                                              |
| <b><u>NCH<sub>2</sub>CH<sub>3</sub></u></b>                                       | 2.85<br>(m, 4H)<br>$^3J_{\text{HH}}=7.2$<br>$^3J_{\text{PH}}=6.3$                                                                          | 2.92<br>(m, 4H)<br>$^3J_{\text{HH}}=7.2$<br>$^3J_{\text{PH}}=7.0$                                                                          | 2.71<br>(m, 2H)<br>$^3J_{\text{HH}}=7.2$<br>$^3J_{\text{PH}}=6.5$<br>2.81<br>(m, 2H)<br>$^3J_{\text{HH}}=7.2$<br>$^3J_{\text{PH}}=6.5$                                                                                                                                                   | 2.82<br>(m, 4H)<br>$^3J_{\text{HH}}=7.0$<br>$^3J_{\text{PH}}=7.6$                                                                          | -                                                                                                                                        | 2.72-3.12<br>(m, 4H)                                                 | -                                                                        | 2.68<br>(m, 4H)                                                |
| <b><u>NCH<sub>2</sub>CH<sub>3</sub></u></b>                                       | 1.13<br>(t, 6H)<br>$^3J_{\text{HH}}=7.2$                                                                                                   | 1.18<br>(t, 3H)<br>$^3J_{\text{HH}}=7.2$<br>1.30<br>(t, 3H)<br>$^3J_{\text{HH}}=7.2$                                                       | 1.04<br>(t, 6H)<br>$^3J_{\text{HH}}=7.2$                                                                                                                                                                                                                                                 | 1.09<br>(t, 6H)<br>$^3J_{\text{HH}}=7.0$                                                                                                   | -                                                                                                                                        | 1.09<br>(m, 6H)                                                      | -                                                                        | 1.25<br>(m, 6H)                                                |
| <b><u>CH<sub>3</sub>NCH<sub>2</sub></u></b>                                       | -                                                                                                                                          | -                                                                                                                                          | -                                                                                                                                                                                                                                                                                        | -                                                                                                                                          | 3.00-3.05<br>(m, 4H)                                                                                                                     | -                                                                    | 3.03-3.11<br>(m, 4H)                                                     | -                                                              |
| <b><u>C<sub>2</sub>H<sub>5</sub>NCH<sub>2</sub></u></b>                           | 3.04-3.12<br>(m, 4H)                                                                                                                       | 3.02-3.18<br>(m, 4H)                                                                                                                       | 3.07-3.22<br>(m, 4H)                                                                                                                                                                                                                                                                     | 3.05-3.14<br>(m, 4H)                                                                                                                       | -                                                                                                                                        | 2.72-3.12<br>(m, 4H)                                                 | -                                                                        | 2.68<br>(m, 4H)                                                |
| <b><u>NCH<sub>2</sub>CH<sub>2</sub></u></b>                                       | -                                                                                                                                          | -                                                                                                                                          | -                                                                                                                                                                                                                                                                                        | -                                                                                                                                          | 1.73<br>(m, 4H)                                                                                                                          | 1.75<br>(m, 4H)                                                      | 1.76<br>(m, 4H)                                                          | 1.73<br>(m, 4H)                                                |
| <b><u>NCH<sub>2</sub></u></b>                                                     | 3.04-3.12<br>(m, 4H)                                                                                                                       | 3.02-3.18<br>(m, 4H)                                                                                                                       | 3.07-3.22<br>(m, 4H)                                                                                                                                                                                                                                                                     | 3.05-3.14<br>(m, 4H)                                                                                                                       | 3.00-3.05<br>(m, 4H)<br>(spiro)<br>3.61-3.66<br>(m, 4H)<br>(Schiff-base)                                                                 | 2.72-3.12<br>(m, 4H)<br>(spiro)<br>3.64<br>(bp, 4H)<br>(Schiff-base) | 3.03-3.11<br>(m, 4H)<br>(spiro)<br>3.47-3.65<br>(m, 4H)<br>(Schiff-base) | 3.12<br>(m, 4H)<br>(spiro)<br>3.12<br>(m, 4H)<br>(Schiff-base) |
| <b><u>FcCH<sub>2</sub></u></b>                                                    | 3.67<br>$^3J_{\text{PH}}=7.5$<br>$^2J_{\text{HH}}=11.5$<br>(dd, 2H)<br>3.68<br>$^3J_{\text{PH}}=7.6$<br>$^2J_{\text{HH}}=11.5$<br>(dd, 2H) | 3.69<br>$^3J_{\text{PH}}=7.8$<br>$^2J_{\text{HH}}=14.3$<br>(dd, 2H)<br>3.77<br>$^3J_{\text{PH}}=7.3$<br>$^2J_{\text{HH}}=14.3$<br>(dd, 2H) | 3.61<br>$^3J_{\text{PH}}=7.5$<br>$^2J_{\text{HH}}=14.8$<br>(dd, 1H)<br>3.64<br>$^3J_{\text{PH}}=7.5$<br>$^2J_{\text{HH}}=14.8$<br>(dd, 1H)<br>3.73<br>$^3J_{\text{PH}}=8.0$<br>$^2J_{\text{HH}}=14.7$<br>(dd, 1H)<br>3.76<br>$^3J_{\text{PH}}=8.1$<br>$^2J_{\text{HH}}=14.7$<br>(dd, 1H) | 3.78<br>$^3J_{\text{PH}}=8.3$<br>$^2J_{\text{HH}}=14.2$<br>(dd, 2H)<br>3.81<br>$^3J_{\text{PH}}=8.3$<br>$^2J_{\text{HH}}=14.2$<br>(dd, 2H) | 3.74<br>$^3J_{\text{PH}}=6.6$<br>$^2J_{\text{HH}}=9.0$<br>(dd, 2H)<br>3.75<br>$^3J_{\text{PH}}=6.6$<br>$^2J_{\text{HH}}=9.0$<br>(dd, 2H) | 3.64<br>(bp, 4H)                                                     | 3.80<br>(m, 4H)                                                          | 3.63<br>(bp, 4H)                                               |

|                        |                                                                                             |                                                                                             |                                                                                                                |                                                       |                                                                                                                |                   |                                                                                                                |                   |
|------------------------|---------------------------------------------------------------------------------------------|---------------------------------------------------------------------------------------------|----------------------------------------------------------------------------------------------------------------|-------------------------------------------------------|----------------------------------------------------------------------------------------------------------------|-------------------|----------------------------------------------------------------------------------------------------------------|-------------------|
| <b>H4</b>              | 4.03<br>(bp, 10H)                                                                           | 4.10<br>(bp, 10H)                                                                           | 4.05<br>(bp, 10H)                                                                                              | 4.15<br>(bp, 10H)                                     | 3.99<br>4.00<br>(bp, 10H)                                                                                      | 4.02<br>(bp, 10H) | 4.03<br>4.04<br>(bp, 10H)                                                                                      | 4.04<br>(bp, 10H) |
| <b>H3</b>              | 4.04<br>(bp, 4H)                                                                            | 4.03<br>(bp, 4H)                                                                            | 4.06<br>4.08<br>(bp, 4H)                                                                                       | 4.12<br>(bp, 4H)                                      | 4.02<br>4.03<br>(bp, 4H)                                                                                       | 3.90<br>(bp, 4H)  | 4.12<br>4.13<br>(bp, 4H)                                                                                       | 3.91<br>(bp, 4H)  |
| <b>H2</b>              | 4.08<br>(bp, 4H)                                                                            | 4.18<br>4.19<br>(bp, 4H)                                                                    | 4.14<br>(bp, 4H)                                                                                               | 4.20<br>(bp, 4H)                                      | 4.09<br>4.15<br>(bp, 4H)                                                                                       | 4.12<br>(bp, 4H)  | 4.18<br>(bp, 4H)                                                                                               | 4.10<br>(bp, 4H)  |
| <b>OCH<sub>3</sub></b> | 3.90<br>(s, 6H)                                                                             | 3.93<br>(s, 3H)                                                                             | 3.85<br>3.92<br>(s, 6H)                                                                                        | 3.90<br>(s, 3H)                                       | 3.83<br>3.88<br>(s, 6H)                                                                                        | 3.86<br>(s, 6H)   | 3.91<br>(s, 6H)                                                                                                | 3.82<br>(s, 6H)   |
| <b>CHO</b>             | 9.94<br>(s, 2H)                                                                             | 9.95<br>(s, 1H)                                                                             | 9.89<br>9.92<br>(s, 2H)                                                                                        | 9.95<br>(s, 1H)                                       | -                                                                                                              | -                 | -                                                                                                              | -                 |
| <b>CHN</b>             | -                                                                                           | -                                                                                           | -                                                                                                              | -                                                     | 8.18<br>8.20<br>(s, 2H)                                                                                        | 8.22<br>(s, 2H)   | 8.19<br>(s, 2H)                                                                                                | 8.20<br>(s, 2H)   |
| <b>H6'</b>             | 7.98<br><sup>3</sup> J <sub>HH</sub> = 8.2<br>(d, 2H)                                       | 7.86<br><sup>3</sup> J <sub>HH</sub> = 8.1<br>(d, 1H)                                       | 7.93<br>7.88<br><sup>3</sup> J <sub>HH</sub> = 8.0<br>(d, 1H)                                                  | 7.82<br><sup>3</sup> J <sub>HH</sub> = 8.1<br>(d, 1H) | 7.77<br>7.79<br><sup>3</sup> J <sub>HH</sub> = 8.4<br>(d, 1H)                                                  | 7.83<br>(bp, 2H)  | 7.69<br>7.80<br><sup>3</sup> J <sub>HH</sub> = 7.8<br>(d, 1H)                                                  | 7.85<br>(bp, 2H)  |
| <b>H5'</b>             | 7.46<br><sup>3</sup> J <sub>HH</sub> = 8.2<br><sup>4</sup> J <sub>HH</sub> = 1.9<br>(m, 2H) | 7.46<br><sup>3</sup> J <sub>HH</sub> = 8.1<br><sup>4</sup> J <sub>HH</sub> = 1.5<br>(m, 1H) | 7.30<br><sup>3</sup> J <sub>HH</sub> = 8.2<br>(d, 1H)<br>7.31<br><sup>3</sup> J <sub>HH</sub> = 8.0<br>(d, 1H) | 7.47<br><sup>3</sup> J <sub>HH</sub> = 8.1<br>(d, 1H) | 7.14<br><sup>3</sup> J <sub>HH</sub> = 8.4<br>(d, 1H)<br>7.17<br><sup>3</sup> J <sub>HH</sub> = 8.4<br>(d, 1H) | 7.29<br>(bp, 2H)  | 7.09<br><sup>3</sup> J <sub>HH</sub> = 8.4<br>(d, 1H)<br>7.11<br><sup>3</sup> J <sub>HH</sub> = 7.8<br>(d, 1H) | 7.29<br>(bp, 2H)  |
| <b>H3'</b>             | 7.48<br><sup>4</sup> J <sub>HH</sub> = 1.9<br>(d, 2H)                                       | 7.51<br><sup>4</sup> J <sub>HH</sub> = 1.5<br>(d, 1H)                                       | 7.42<br>7.44<br>(s, 2H)                                                                                        | 7.49<br>(s, 1H)                                       | 7.40<br>7.44<br>(s, 2H)                                                                                        | 7.46<br>(s, 2H)   | 7.36<br>7.44<br>(s, 2H)                                                                                        | 7.46<br>(s, 2H)   |

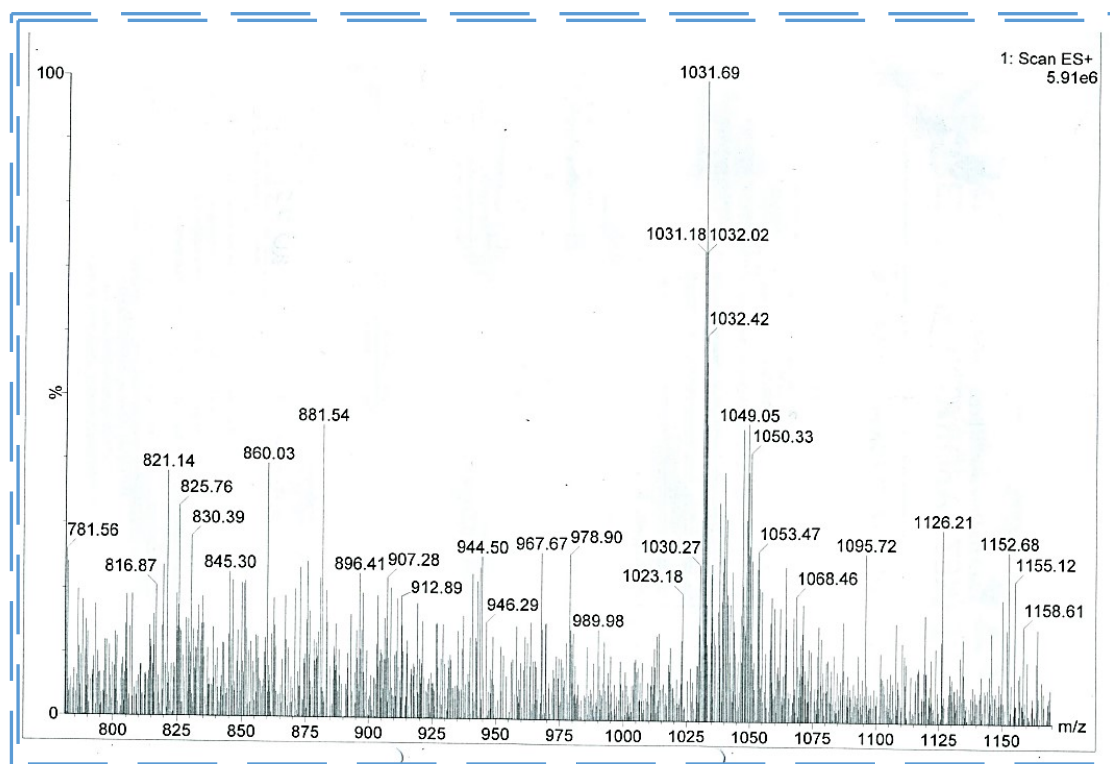

**Fig. S1** The ESI-MS spectrum of compound **12**.

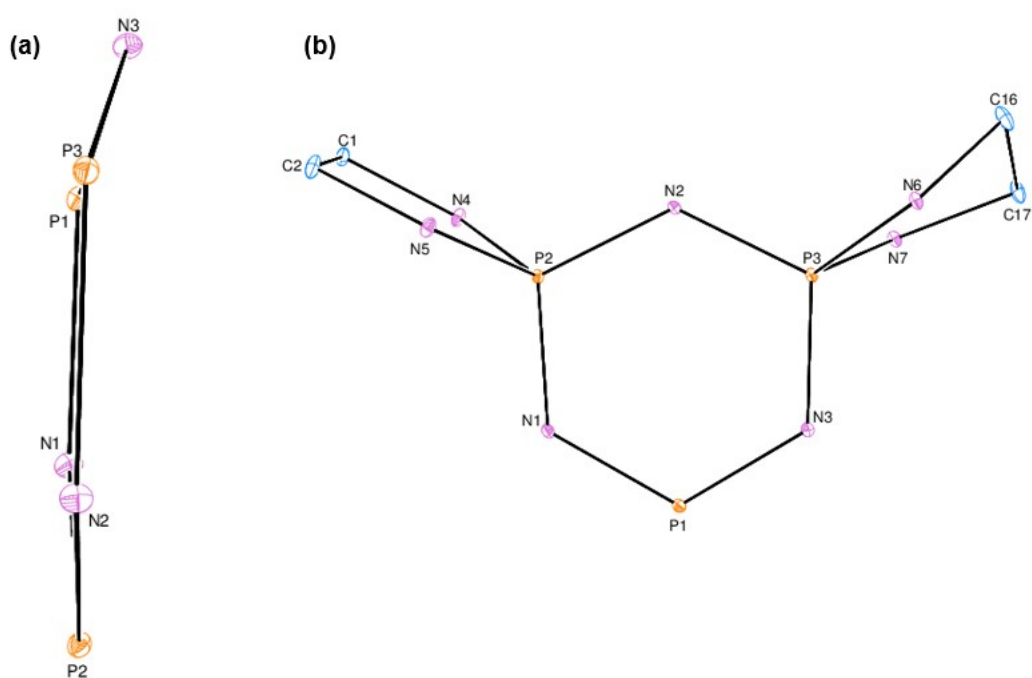

**Fig. S2** The conformations of (a) the phosphazene ring and (b) the five-membered spiro-ring of **6**.

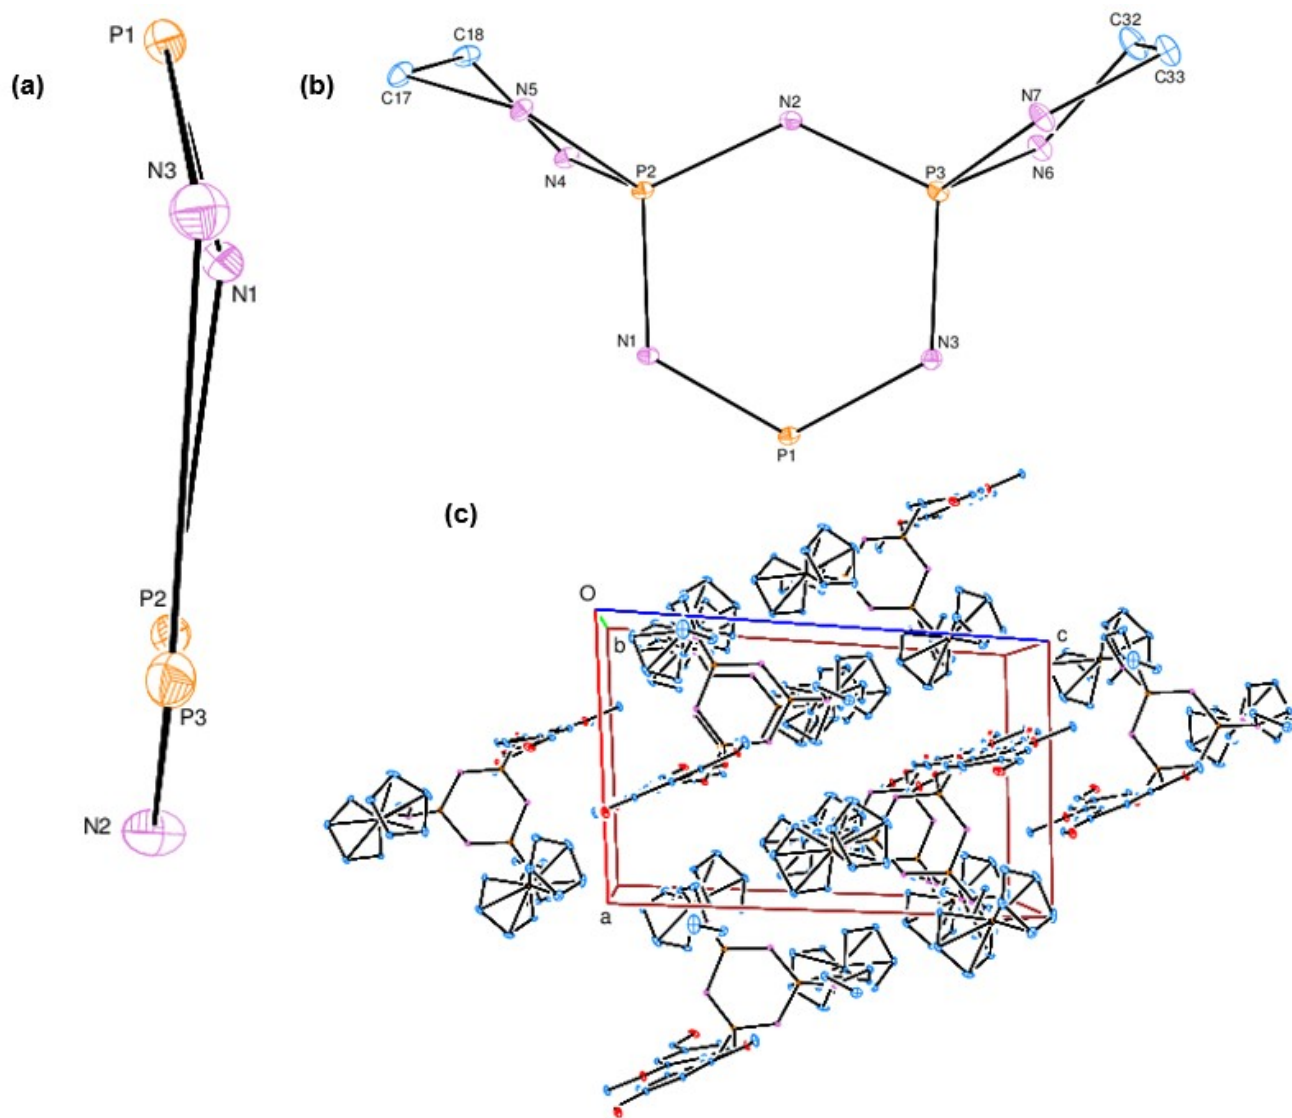

**Fig. S3** The conformations of (a) the phosphazene ring and (b) the five-membered spiro-ring of **9**.

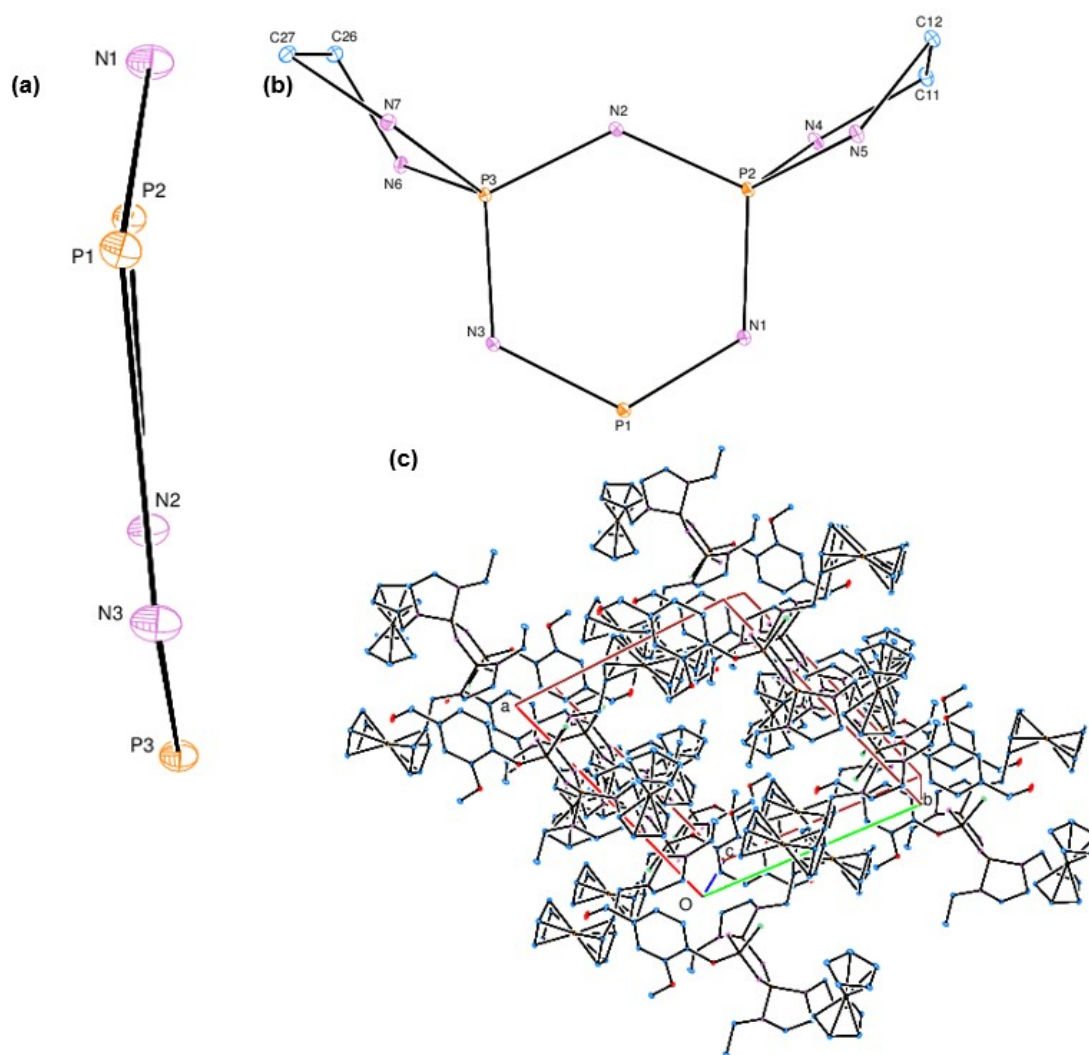

**Fig. S4** The conformations of (a) the phosphazene ring and (b) the five-membered spiro-ring of **10**.

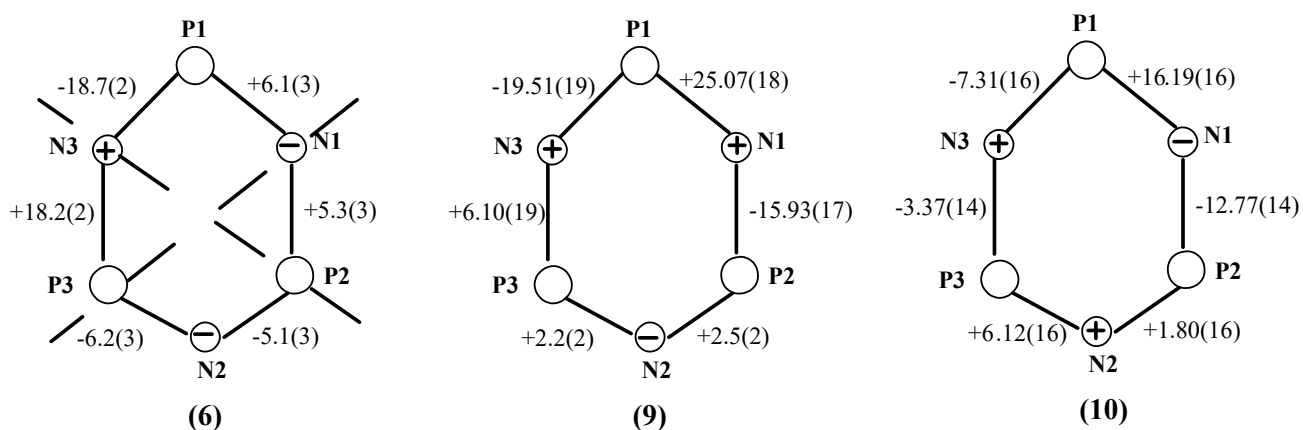

**Fig. S5** The shapes of the phosphazene rings in **6**, **9** and **10** with torsion angles (deg).
